# Supplementary material for: Enhanced In Vivo Radiotherapy of Breast Cancer Using Gadolinium Oxide and Gold Hybrid Nanoparticles
Source: PubMed Central journal article supplement (PMC9945098; doi:10.1021/acsabm.2c00965), 2023-01-24
Supplement: mt2c00965_si_001.pdf [file mt2c00965_si_001.pdf]

## Supporting Information

### Enhanced in vivo radiotherapy of breast cancer using gadolinium oxide and gold hybrid nanoparticles

Hamed Nosrati<sup>1</sup>, Marziyeh Salehiabar<sup>1</sup>, Jalil Charmi<sup>1</sup>, Kadir Yaray<sup>2</sup>, Mohammadreza Ghaffarlou<sup>3</sup>, Esra Balcioglu<sup>4</sup>, Yavuz Nuri Ertas<sup>1,5,6\*</sup>

<sup>1</sup>ERNAM—Nanotechnology Research and Application Center, Erciyes University, Kayseri, Turkey

<sup>2</sup>Department of Radiation Oncology, Faculty of Medicine, Erciyes University, Kayseri, Turkey

<sup>3</sup>Hacettepe University, Department of Chemistry, Beytepe, Ankara, Turkey

<sup>4</sup>Department of Histology and Embryology, Faculty of Medicine, Erciyes University, Kayseri, Turkey

<sup>5</sup>Department of Biomedical Engineering, Erciyes University, Kayseri, Turkey

<sup>6</sup>UNAM—National Nanotechnology Research Center, Bilkent University, Ankara, Turkey

\*Corresponding Author :

Yavuz Nuri Ertas, Ph.D.

Email: [yavuzertas@erciyes.edu.tr](mailto:yavuzertas@erciyes.edu.tr)

ERNAM—Nanotechnology Research and Application Center, Erciyes University

UNAM—National Nanotechnology Research Center, Bilkent University, Ankara, Turkey

Kayseri 38039, Turkey

Web: [www.ertaslab.com](http://www.ertaslab.com)

## Supporting Information

### Enhanced in vivo radiotherapy of breast cancer using gadolinium oxide and gold hybrid nanoparticles

Hamed Nosrati<sup>1</sup>, Marziyeh Salehiabar<sup>1</sup>, Jalil Charmi<sup>1</sup>, Kadir Yaray<sup>2</sup>, Mohammadreza Ghaffarlou<sup>3</sup>, Esra Balcioglu<sup>4</sup>, Yavuz Nuri Ertas<sup>1,5,6\*</sup>

<sup>1</sup>ERNAM—Nanotechnology Research and Application Center, Erciyes University, Kayseri, Turkey

<sup>2</sup>Department of Radiation Oncology, Faculty of Medicine, Erciyes University, Kayseri, Turkey

<sup>3</sup>Hacettepe University, Department of Chemistry, Beytepe, Ankara, Turkey

<sup>4</sup>Department of Histology and Embryology, Faculty of Medicine, Erciyes University, Kayseri, Turkey

<sup>5</sup>Department of Biomedical Engineering, Erciyes University, Kayseri, Turkey

<sup>6</sup>UNAM—National Nanotechnology Research Center, Bilkent University, Ankara, Turkey

\*Corresponding Author :

Yavuz Nuri Ertas, Ph.D.

Email: [yavuzertas@erciyes.edu.tr](mailto:yavuzertas@erciyes.edu.tr)

ERNAM—Nanotechnology Research and Application Center, Erciyes University

UNAM—National Nanotechnology Research Center, Bilkent University, Ankara, Turkey

Kayseri 38039, Turkey

Web: [www.ertaslab.com](http://www.ertaslab.com)

## Supporting figures

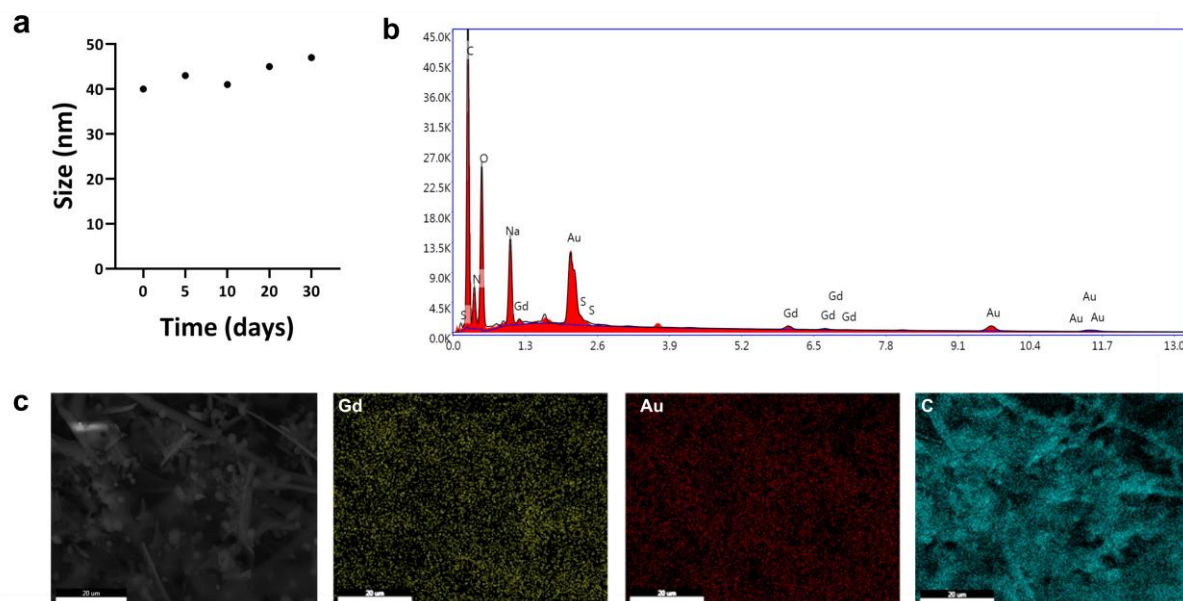

**Figure S1.** a) Size monitoring of Gd<sub>2</sub>O<sub>3</sub>@BSA-Au NPs in PBS; b) EDS spectra of Gd<sub>2</sub>O<sub>3</sub>@BSA-Au NPs; and (b) SEM-EDS Mapping of Gd<sub>2</sub>O<sub>3</sub>@BSA-Au NPs.

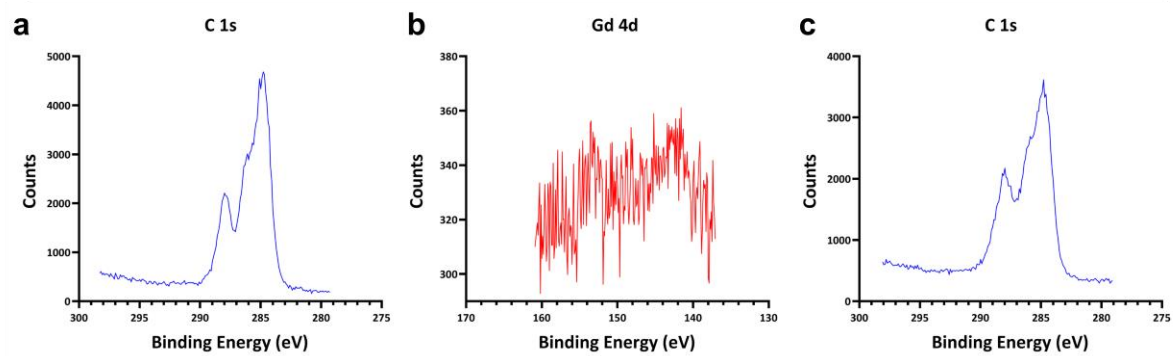

**Figure S2.** a) C 1S XPS spectra in Gd<sub>2</sub>O<sub>3</sub>@BSA; b) Gd 4d XPS spectra in Gd<sub>2</sub>O<sub>3</sub>@BSA-Au; c) C 1S XPS spectra in Gd<sub>2</sub>O<sub>3</sub>@BSA-Au.
